# Supplementary material
Source: PubMed Central journal article supplement (PMC4413318)
Supplement: pnas.201424044SI.pdf [file pnas.201424044SI.pdf]

# Supporting Information

Youssef et al. 10.1073/pnas.1424044112

## SI Materials and Methods

**Bioinformatics Analysis.** NovoindeX ([www.novocraft.com](http://www.novocraft.com)) was used to create a mouse genome index (M\_musculus\_Jul\_2007 version) with extended splice junctions. Novoalign (Novocraft) was used to align raw reads in FASTAQ format against the indexed mouse genome and to strip adapter sequences from each end before alignment. Default parameters were used except  $\leq 100$  alignments per read were allowed if the read could be aligned to more than one genomic location (-r All100 was used). Dataset S4 shows the number of total, aligned, and unique reads for each sample.

Aligned reads were analyzed with USeq ([www.sourceforge.net/projects/USeq](http://www.sourceforge.net/projects/USeq)) (1). The SamTranscriptome Parser application was used with parameters to convert coordinates to genomic space and to sort and save alignments in BAM format. Default parameters were used except we allowed up to about five mismatches (-a 150), one alignment/read (-n 1, -d), and merged proper paired alignments (-p).

To identify enriched annotated genes, we used DRSS and DRDS applications. We used DRSS and DRDS with default parameters. DRSS uses a binomial distribution to calculate  $P$  values and Storey's  $q$ -value method to convert to FDRs; DRDS uses DESeq's variance-corrected count to calculate fold change and FDR (2, 3). Mm9 Ensembl transcriptome file downloaded from University of California at Santa Cruz was used as an input gene table. The ScanSeqs application was used to identify enriched annotated and unannotated regions using a 50-bp sliding window across the genome. The binomial  $P$  value was converted to FDR using Storey's  $q$ -value method.

**UV-Cross-Linking RNA Immunoprecipitation and RT-qPCR.** Cells were irradiated with 254 nm UV light at 200 mJ/cm<sup>2</sup>. Twenty percent of each cell lysate was saved to serve as an input sample for RT-qPCR. Immunoprecipitation was performed as described in *Materials and Methods* except beads were washed eight times with lysis buffer containing 750 mM NaCl. Beads and input samples were treated with 0.8 mg proteinase K (Invitrogen) for 20 min at 37 °C in buffer A (100 mM Tris-Cl, pH 7.5, 50 mM NaCl, 10 mM EDTA) and for another 20 min in buffer B (buffer A supplemented with 7 M urea). RNA was extracted from cell lysates (Input) and immunoprecipitated fractions using TRIzol. RNA samples were treated with Turbo DNase and ethanol-precipitated.

cDNAs were generated using random hexamer primers and SuperScript Reverse transcriptase II (Invitrogen). qPCR was performed using SYBR green dye (Roche) on a real-time PCR machine (LightCycler 2.0, Roche); qPCR primers are in Dataset S3.

**Protein Expression and Purification.** pPET-PKR/PPase plasmid (Addgene) was used to express human wild-type PKR. The expression vector was transformed into BL21(DE3) Rosetta cells (New England Biolabs). PKR was expressed and purified as described (4, 5).

**In Vitro Transcription.** cDNAs for snoRNAs were PCR-amplified from mouse genomic DNA and cloned into a TOPO vector (Invitrogen). Unlabeled and uniformly <sup>32</sup>P-labeled RNA was synthesized using T7 RNA polymerase. To generate RNA with a 5'-monophosphate, RNA was treated with Antarctic phosphatase followed by T4 PNK (NEB). Some mouse snoRNAs were cloned into pss419 (gift of Sandra Searles, Medical Research Council Laboratory of Molecular Biology, Cambridge, United Kingdom) and transcribed as described (6).

**In Vitro Autophosphorylation Assays.** Purified PKR (100 nM) was incubated with various concentrations of RNA in PKR activation buffer as described (7). Gels were exposed to PhosphorImage screens. Activation was determined using ImageQuant software.

**Gel Mobility Shift.** A total of 50 pM of <sup>32</sup>P-RNA was incubated alone or with various amounts of dephosphorylated PKR in binding buffer [25 mM Hepes, pH 7.5, 100 mM NaCl, 5% (vol/vol) glycerol, 5 mM DTT, 0.1 mM EDTA] for 7 min at 25 °C. The complexes were electrophoresed on a 6% native polyacrylamide gel (37.5:1) and visualized using a Phosphor-Imager (Typhoon Trio, GE Healthcare).

**Cell Fractionation, Western Blots, and RT-qPCR.** Cells were scraped off plates in hypotonic buffer [10 mM Hepes, pH 7.9, 10 mM KCl, 0.1 mM EGTA, 0.1 mM EDTA, 1 mM DTT, 0.5 mM PMSF, 1× protease inhibitor mixture (Roche)] and centrifuged (1,000 ×  $g$ , 5 min). Cell pellets were incubated in hypotonic buffer supplemented with 0.1% Nonidet P-40 for 30 min on ice and centrifuged (6,000 ×  $g$ , 1 min). Supernatants (cytoplasmic fractions) were transferred to new tubes, and salt was adjusted to 150 mM. Remaining pellets were incubated with nuclear buffer (20 mM Hepes, pH 7.9, 400 mM KCl, 1 mM EDTA, 1 mM EGTA, 1 mM DTT, 1 mM PMSF, 1× protease inhibitor mixture) for 30 min on ice and centrifuged (10,000 ×  $g$ , 15 min); supernatants were transferred to new tubes, and salt was adjusted to 150 mM.

Equivalent amounts of protein were analyzed on a 4–15% gradient gel (Bio-Rad) and transferred to PVDF by electroblotting. PKR was detected with the anti-flag M2 antibody (Sigma). As a control for fractionation, cytoplasmic and nuclear proteins were analyzed by Western using an antibody against  $\alpha$ / $\beta$ -tubulin and PARP (Cell Signaling), respectively.

Total RNA was extracted from cytoplasmic and nuclear fractions using TRIzol. qPCR was performed as above.

**Indirect Immunofluorescence.** Cells were fixed with 3.7% (vol/vol) paraformaldehyde in PBS for 20 min on ice and then permeabilized for 3 min in 0.2% Triton X-100 at room temperature (RT). Cells were blocked overnight at 4 °C in blocking buffer [10% (vol/vol) goat serum, 0.2% gelatin, 0.1% Triton X-100]. Cells were incubated with PKR antibody (K17, SCBT) overnight at 4 °C, washed six times with PBS, and incubated with Alexa-fluor 488 antibody (Life Technologies) for 2 h at RT. Cells were mounted in ProLong gold antifade reagent with DAPI (Life technologies) for 5 min at RT. Images were obtained using an Olympus FV1000 confocal microscope (University of Utah, Cores Research Facility).

**RNA Transfection and Western Blot.** MEFs were transfected with 3  $\mu$ g of 5'-triphosphorylated or 5'-monophosphorylated RNA using Lipofectamine 3000 (Life Technologies) for 4 h at 37 °C. Cells were washed two times with PBS and lysed in SDS protein-loading buffer. Western analyses were performed as above using p-PKR antibody (Thr-451, SCBT). PKR phosphorylation activity was normalized to the number of molecules of transfected snoRNA. RNA copy number was calculated using the formula [copy number = (amount (ng)  $\times$  6.022  $\times$  10<sup>23</sup>)/(length (nt)  $\times$  10<sup>9</sup>  $\times$  330)].

**eIF2 $\alpha$  Phosphorylation Activity in Cell Lysate.** MEFs or CHO cells were lysed in lysis buffer. Cell lysate was incubated with or without snoRNA for 1 h at 30 °C. Western analysis was performed as described above using phospho-eIF2 $\alpha$  antibody (Ser51, Cell Signaling).







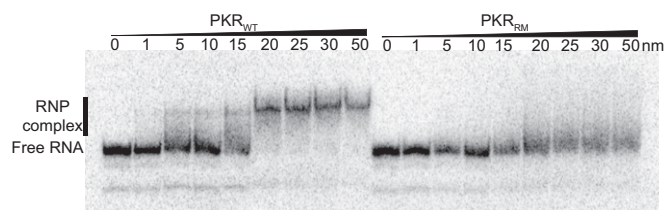

**Fig. S5.** snoRNAs bind to PKR<sub>WT</sub> but not PKR<sub>RM</sub> in vitro. In vitro-transcribed <sup>32</sup>P-uniformly labeled SNORD113 (50 pM, triphosphorylated) was incubated with increasing amounts of PKR<sub>WT</sub> or PKR<sub>RM</sub> (nM as indicated) followed by electrophoresis on a native gel to separate PKR-bound species from free RNA (*SI Materials and Methods*). The RNA signal was quantified from a PhosphorImage using ImageQuant software (GE Healthcare).

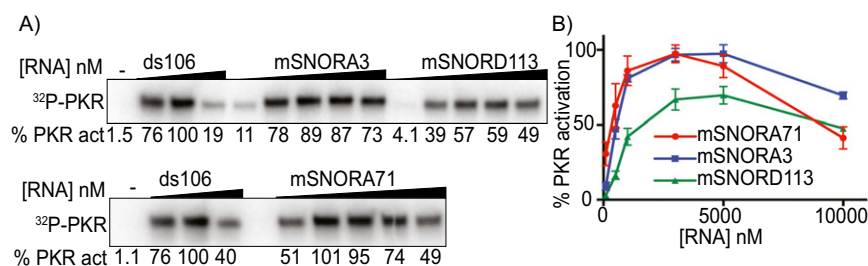

**Fig. S6.** PKR activation by snoRNAs follows a bell-shaped curve. (A) PKR autophosphorylation by snoRNAs. snoRNA concentrations were 100, 1,000, 3,000, 5,000, and 10,000 nM; ds106 concentrations were 1, 5, and 50 nM. Phosphorylation activities were normalized with reactions of 5 nM ds106. (B) Averaged activation data for SNORA3, SNORA71, and SNORD113. Error bars represent mean  $\pm$  SE,  $n \geq 2$ . snoRNA (2000 nM) was tested and is shown on the graph but not on the gel.

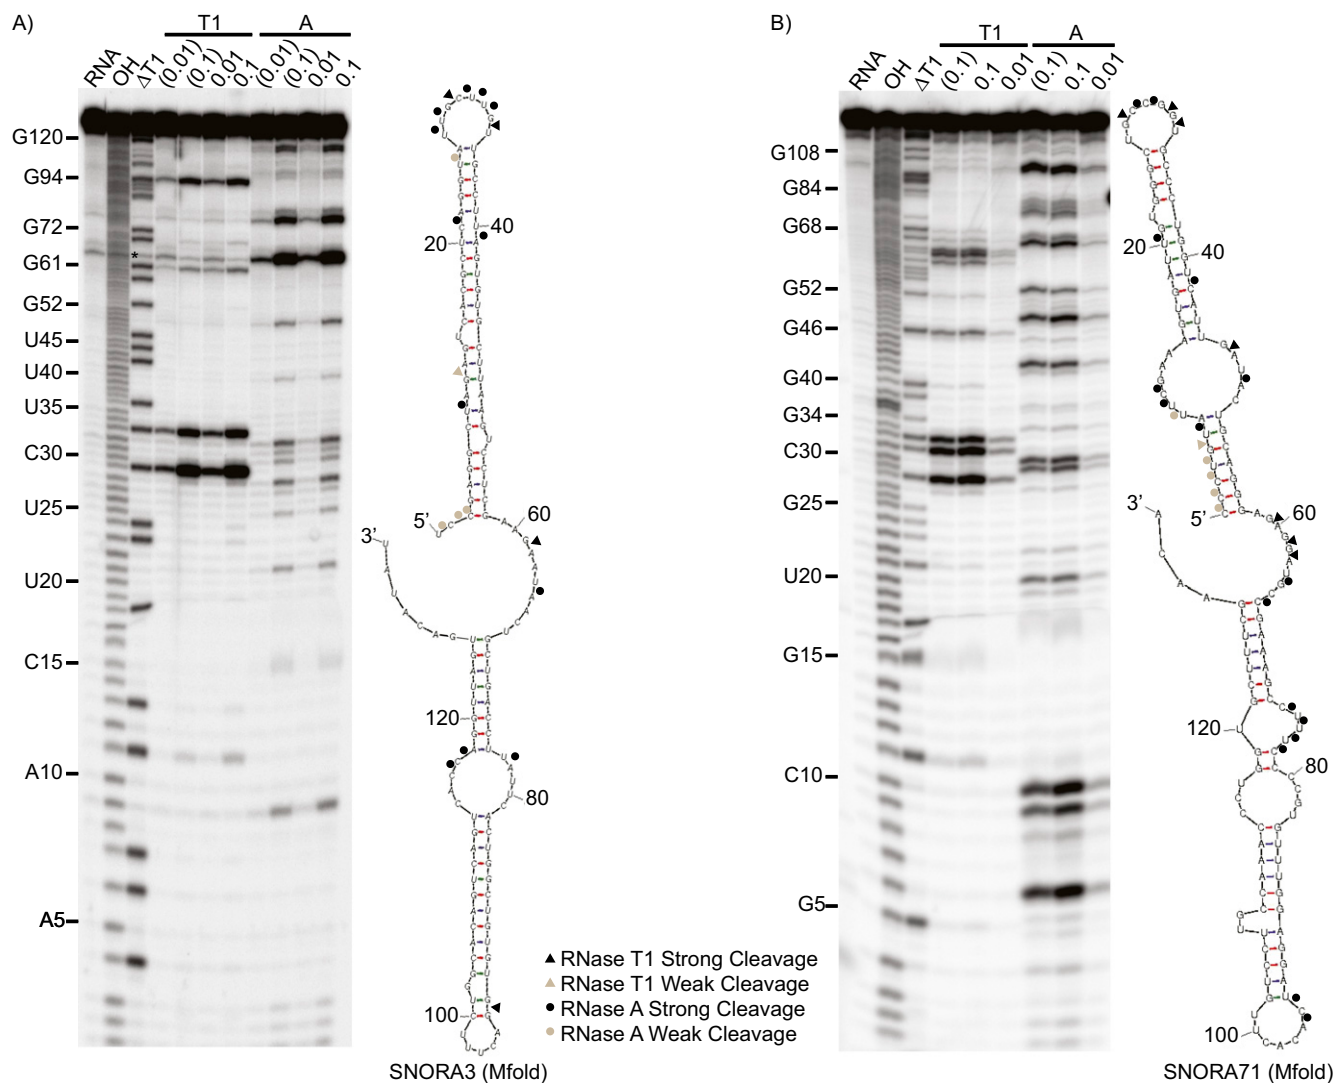

**Fig. 57.** Secondary structure mapping of SNORA3 and SNORA71. 5'-End-labeled SNORA3 (A) and SNORA71 (B) was digested with indicated concentrations of RNase T1 (unit) and RNase A (ng). RNA indicates no treatment, OH indicates alkaline hydrolysis, ΔT1 indicates RNase T1 cleavage under denaturing conditions, T1 and A indicate RNase T1 and A cleavage under native conditions, respectively. Secondary structure of each snoRNA (predicated using Mfold) is shown to the right side of the corresponding sequencing gel. RNase T1 and A cleavages were performed at 30 °C (parentheses) or 37 °C under native conditions. U121–U132 in SNORA3 and C109–A131 in SNORA71 were not mapped. The asterisk indicates nonspecific cleavage.

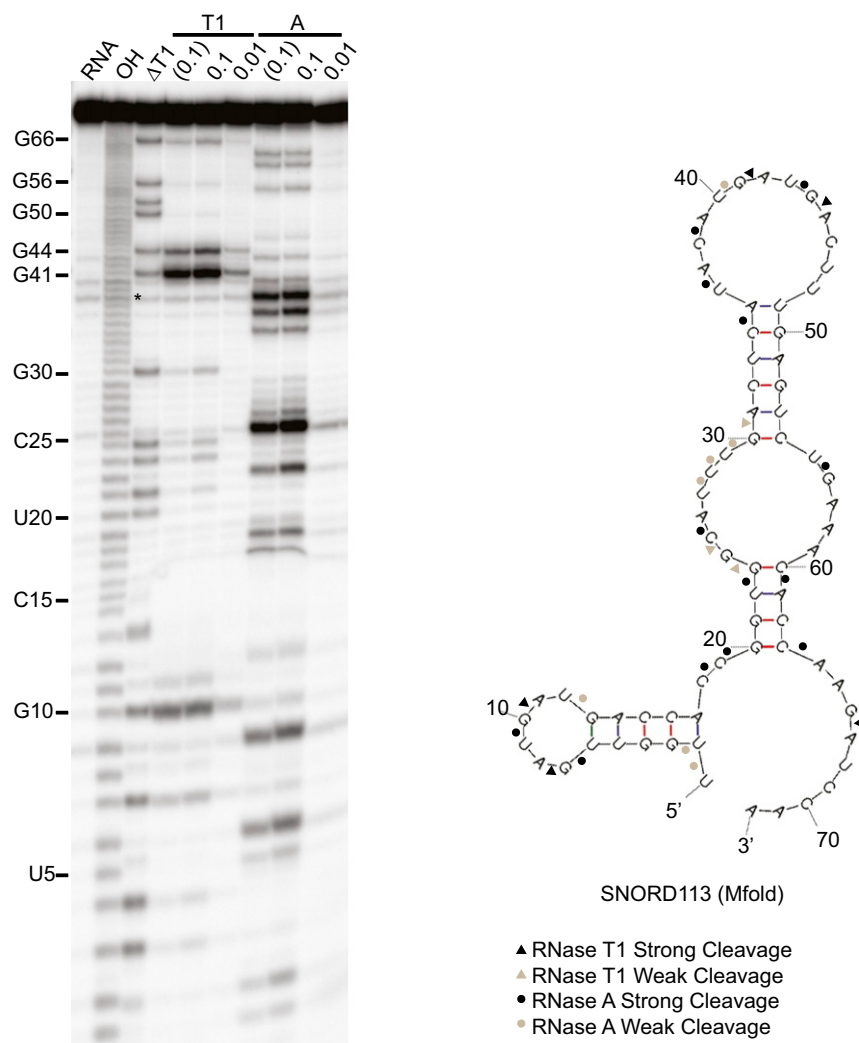

**Fig. S8.** Secondary structure mapping of SNORD113. Nuclease cleavage and secondary structure of SNORD113. Labels are as in Fig. S7. A67–A72 in SNORD113 was not unmapped. An asterisk indicates nonspecific cleavage.

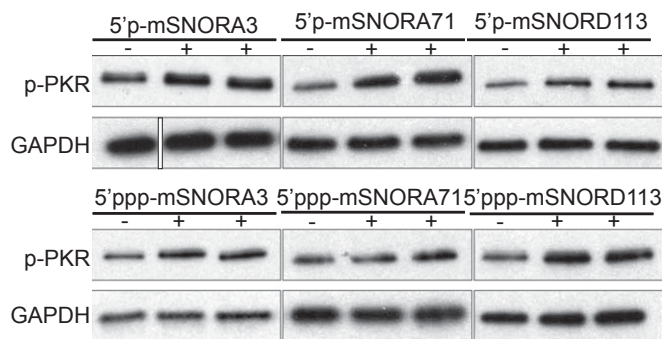

**Fig. S9.** snoRNAs activate PKR in cells. Western analysis of p-PKR in mock-treated (–) and snoRNA-treated (+) cells. GAPDH, loading control. White space indicates where intervening lanes were removed from the figures.

**Dataset S1. Enriched annotated genes in PKR<sub>WT</sub> and PKR<sub>RM</sub> after PA treatment in the three datasets identified using DRDS/DRSS**

[Dataset S1](#)

**Dataset S2.** Enriched annotated and unannotated regions in PKR<sub>WT</sub> and PKR<sub>RM</sub> after PA treatment common to the three datasets identified using ScanSeqs

[Dataset S2](#)

**Dataset S3.** Primers used for qPCR and PCR (to generate templates for in vitro transcription)

[Dataset S3](#)

**Dataset S4.** Number of total, aligned, and unique reads in the three datasets (extracted from Novoalign outputs)

[Dataset S4](#)
